# Supplementary material
Source: publisher figshare collection journal article supplement (https://frontiersin.figshare.com/ndownloader/files/22332996)
Supplement: Supplementary file 1 [file 22332996]

## Appendix 2

Species accumulation curves and rank-abundance plots for seeds found in elephant dung.

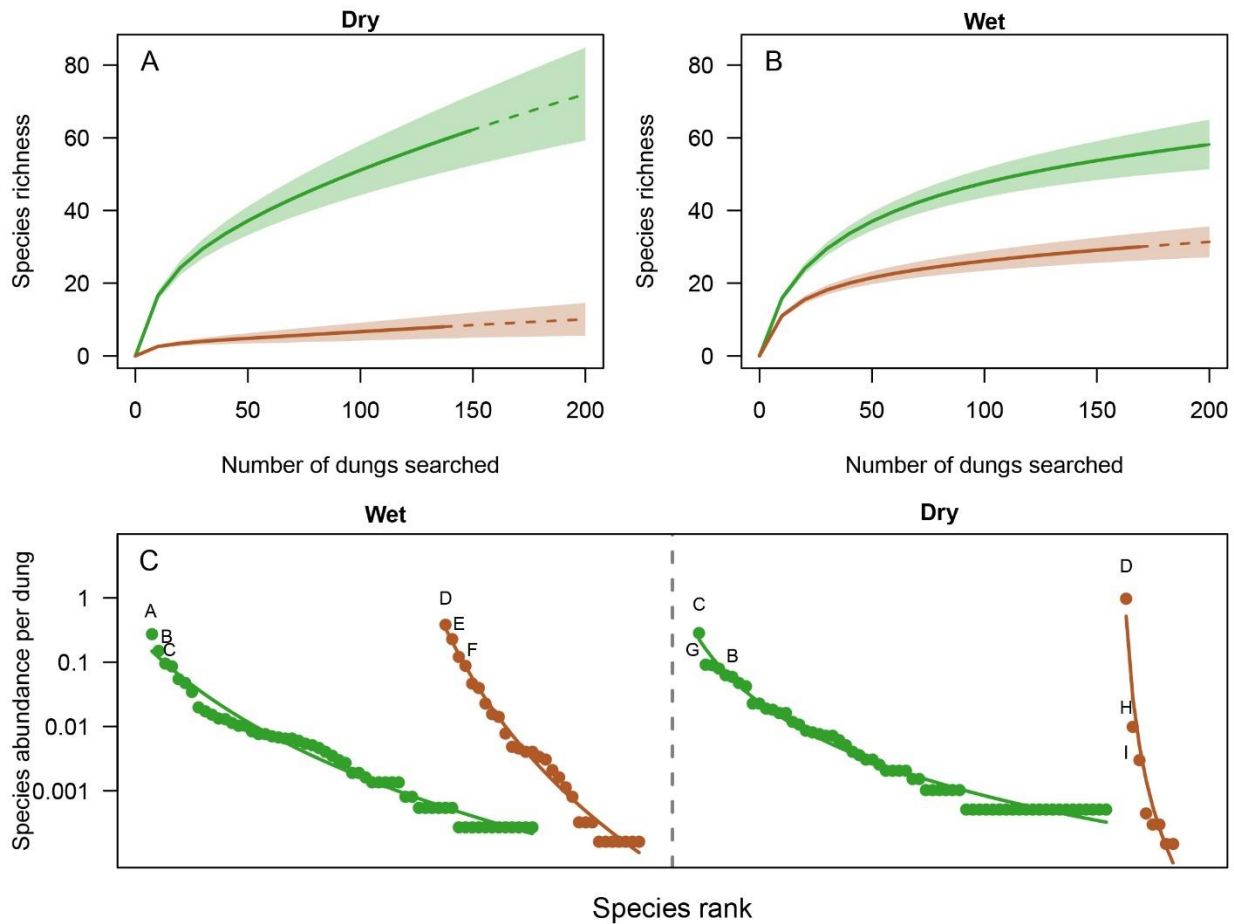

Appendix 2. Sample-based species accumulation curves (A and B) and rank-abundance plots (C) for seeds encountered in elephant dung by site (green = Ivindo; brown = Wonga Wongué) and season. In A and B: lines denote the mean species richness for each site and shaded areas represent 95% confidence intervals. In C: points = species specific abundances; lines = fitted values from a mandlebrot model of species abundances; letters = the three most abundant fruit species in each site by season (A = *Afromomum* sp. ; B = *Swartzia fistuloides* ; C = *Klainedoxa* sp.; D = *Sacoglottis gabonensis*; E = *Pachypodanthium staudtii*; F = *Uapaca* sp. G = *Strychnos* sp. ; H = Wonga Wongué msp6 ; I = *Omphalocarpum procerum*).
